# Supplementary material for: Metabolomic and biochemical characterization of a new model of the transition of acute kidney injury to chronic kidney disease induced by folic acid
Source: PeerJ. 2019 Jun 21;7:e7113. doi: 10.7717/peerj.7113 (PMC6590474; doi:10.7717/peerj.7113)
Supplement: Supplemental Information 1 [file peerj-07-7113-s001.xlsx]

## Sheet: Markers
		KIM-1						TNF-a						BUN
		Control	FAIG-Mi	FAIG-Mo	FAIG-S			Control	FAIG-Mi	FAIG-Mo	FAIG-S			Control	FAIG-Mi	FAIG-Mo	FAIG-S
	1	8.75	692.5	627.5	1232.5		1	0.08512	1.92147	3.9136	4.6875		1	17	49	125	240
	2	15	1130	1220	2530		2	0.408654	1.9974	4.14167	7.81601		2	22	65	111	370
	3	16.25	1065	1495	1295		3	0.649038	1.80516	4.40064	7.13141		3	23	43	101	220
	4	37.5	455	737.5	1790		4	0.616987	1.82142	3.9407	6.60096		4	23	75	108	270
	5	92.5	912.5	670	1835		5	0.0821428	1.74823	4.83173	5.94071		5	20	59	105	240
	6	32.5	1152.5	825	1536		6	0.368388	1.78347	4.24567	6.43532		6	20	50	127	230
		CISTATINA						IL-1β						CREATININE
		Control	FAIG-Mi	FAIG-Mo	FAIG-S			Control	FAIG-Mi	FAIG-Mo	FAIG-S			Control	FAIG-Mi	FAIG-Mo	FAIG-S
	1	0.98625	5.73625	7.55625	8.94125		1	0.0319258	0.165808	1.08342	1.46344		1	0.71	0.99	2.31	4.26
S	2	4.44875	10.1937	10.1612	10.4487		2	0.102052	0.086933	1.47477	1.96112		2	0.72	1.79	1.87	7.03
	3	5.61625	7.13625	8.90125	9.06375		3	0.0422245	0.102052	1.10907	1.96652		3	0.65	1.03	1.87	4.33
	4	5.52875	9.04875	10.3662	10.1537		4	0.114315	0.105831	1.3172	1.89701		4	0.45	1.37	2.44	6.29
	5	3.49625	7.16875	9.31625	9.52125		5	0.0628218	0.279094	1.09503	1.79703		5	0.49	1.21	2.32	3.65
	6	5.00625	8.27625	9.76375	9.6		6	0.0706678	0.147944	1.2159	1.94155		6	0.604	1.09	2.23	5.112
		NGAL						IL-6
		Control	FAIG-Mi	FAIG-Mo	FAIG-S			Control	FAIG-Mi	FAIG-Mo	FAIG-S
	1	7.3385	4.477	9.527	3.227		1	0.657484	0.956237	1.74064	1.82173
	2	10.8435	17.257	7.737	13.797		2	0.995322	1.26299	1.76144	2.37162
	3	11.4085	4.187	9.717	4.027		3	0.995322	0.909252	2.45998	1.91736
	4	4.6285	16.947	4.347	4.967		4	0.79262	0.857276	1.53066	2.44958
	5	9.0585	16.917	5.227	4.797		5	0.932952	1.57432	1.43919	1.72817
	6	10.4985	15.397	4.847	4.254		6	0.797817	0.935239	1.58472	2.05769
